# Supplementary material
Source: publisher figshare collection journal article supplement (https://gsajournals.figshare.com/articles/dataset/_/12357563)

Five Folds minus fold: 1

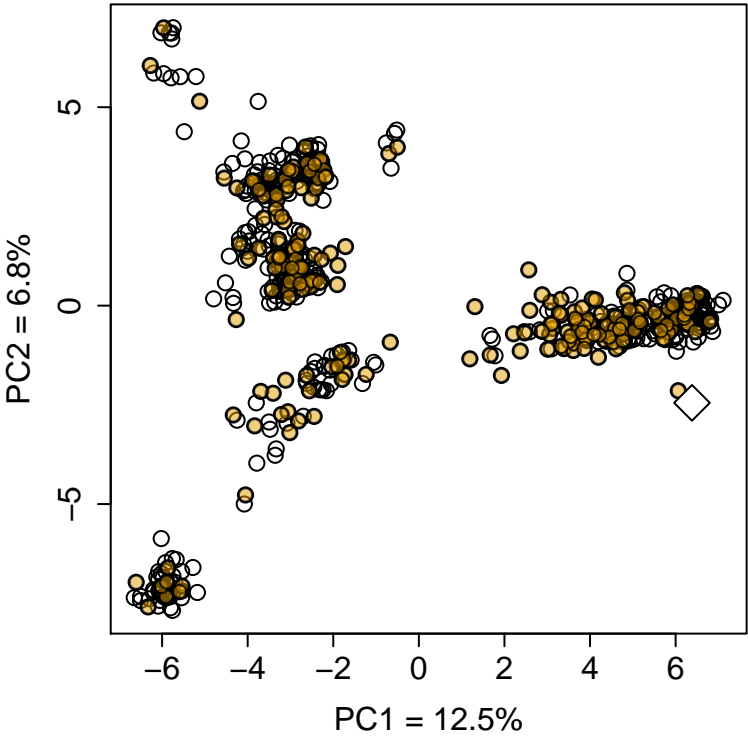

Five Folds minus fold: 2

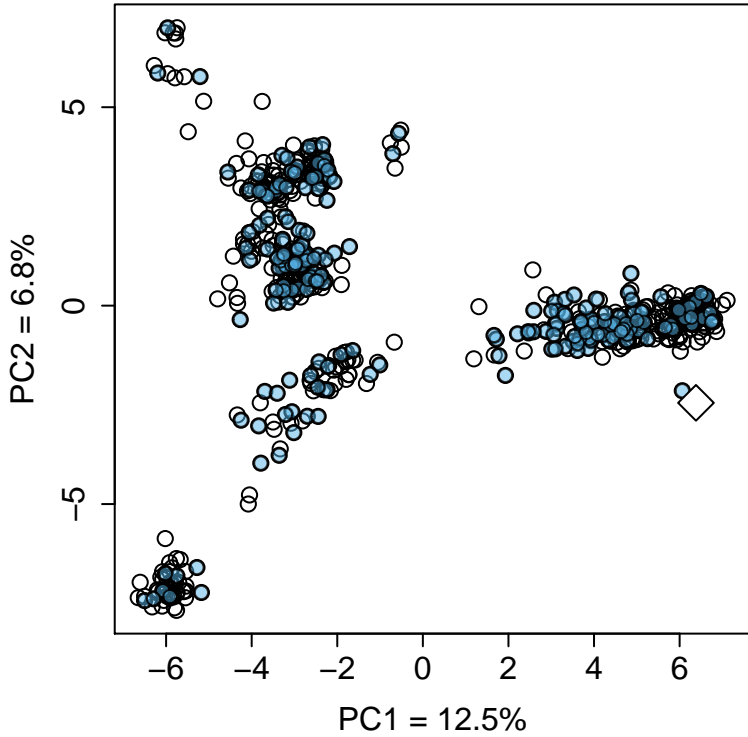

Five Folds minus fold: 3

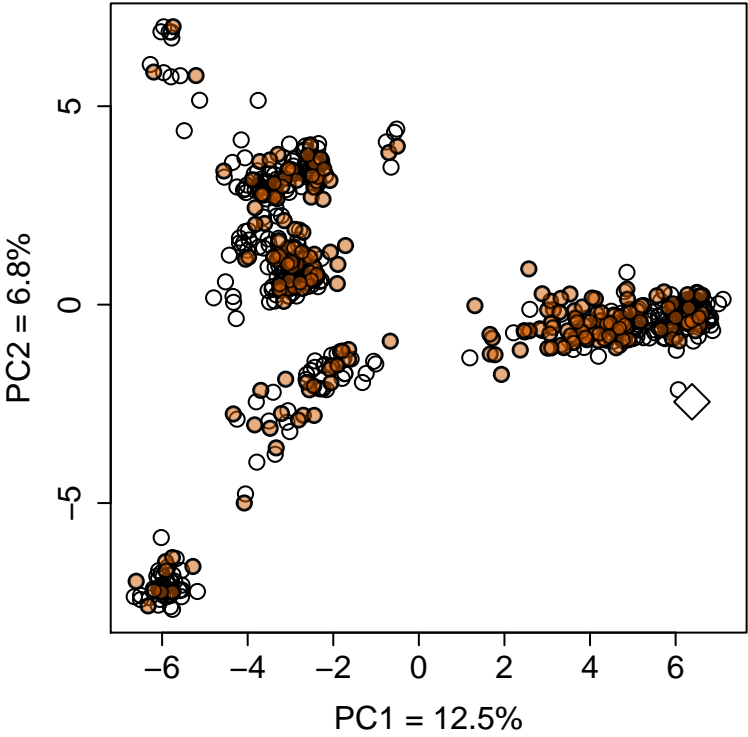

Five Folds minus fold: 4

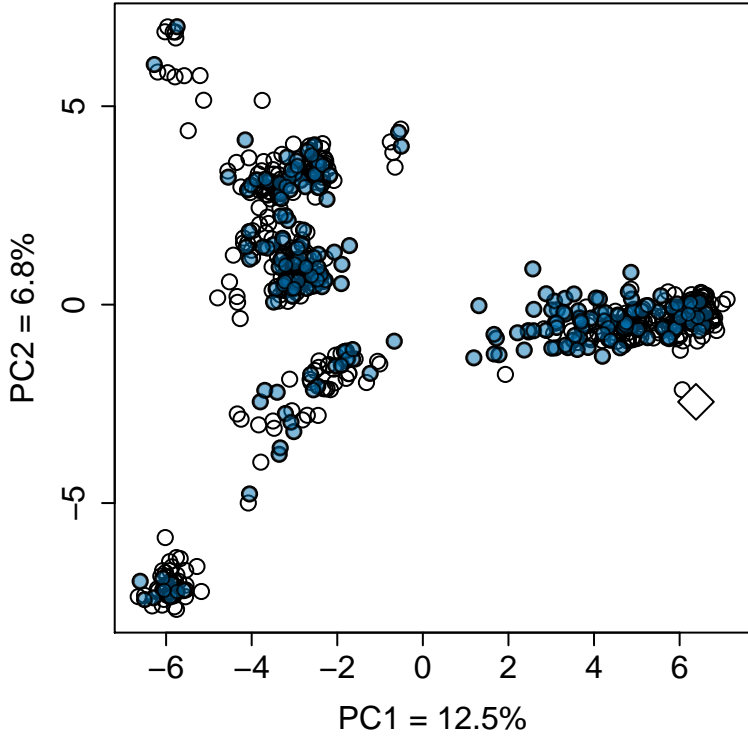

Five Folds minus fold: 5

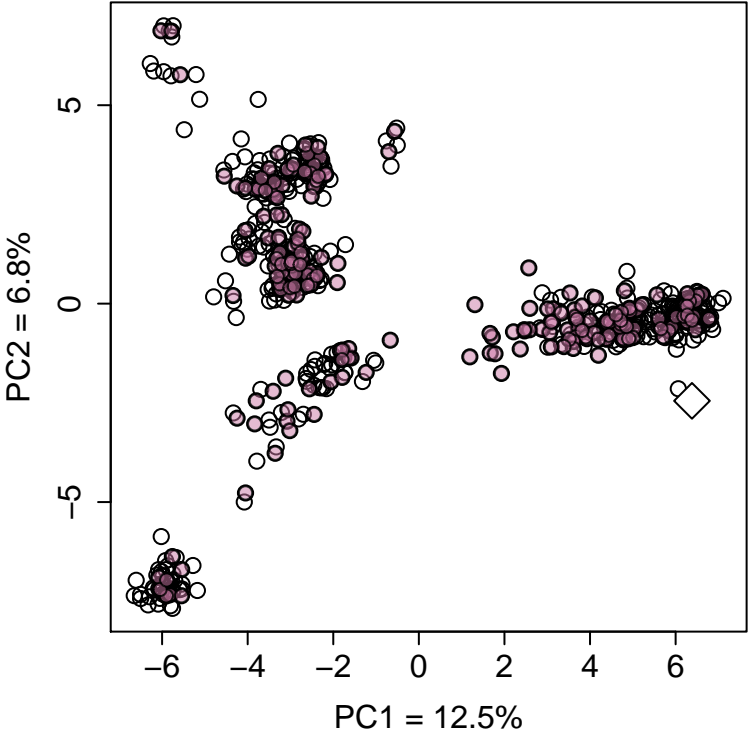

Supplement: Supplementary file 1 [file 1]
