# Supplementary material
Source: publisher figshare collection journal article supplement (https://gsajournals.figshare.com/articles/dataset/_/12357563)

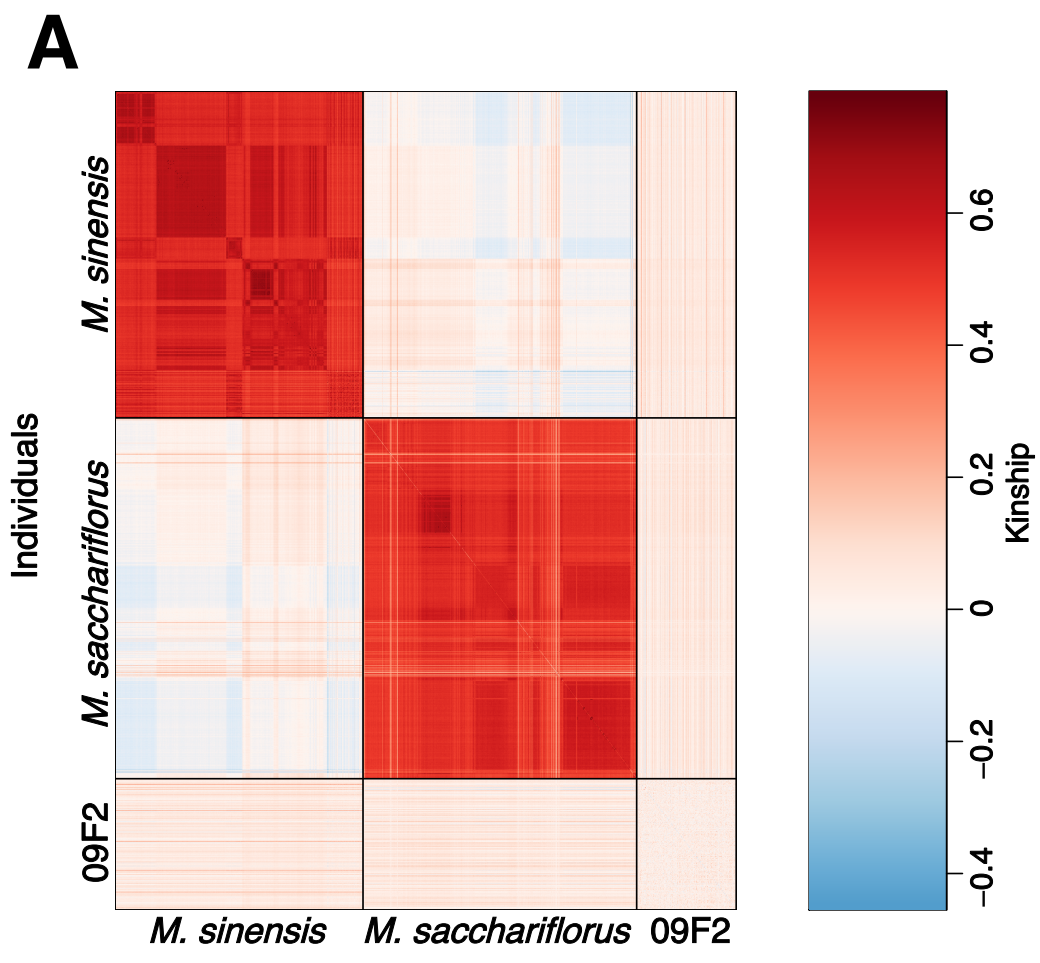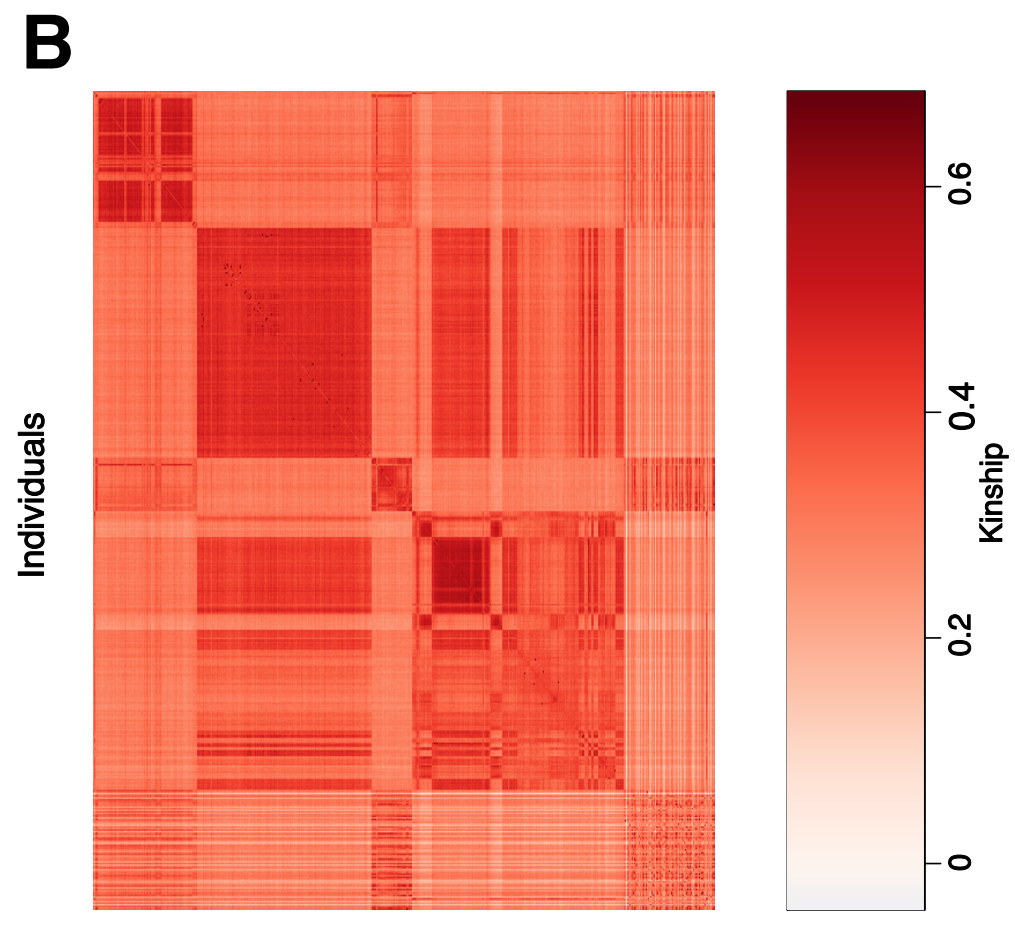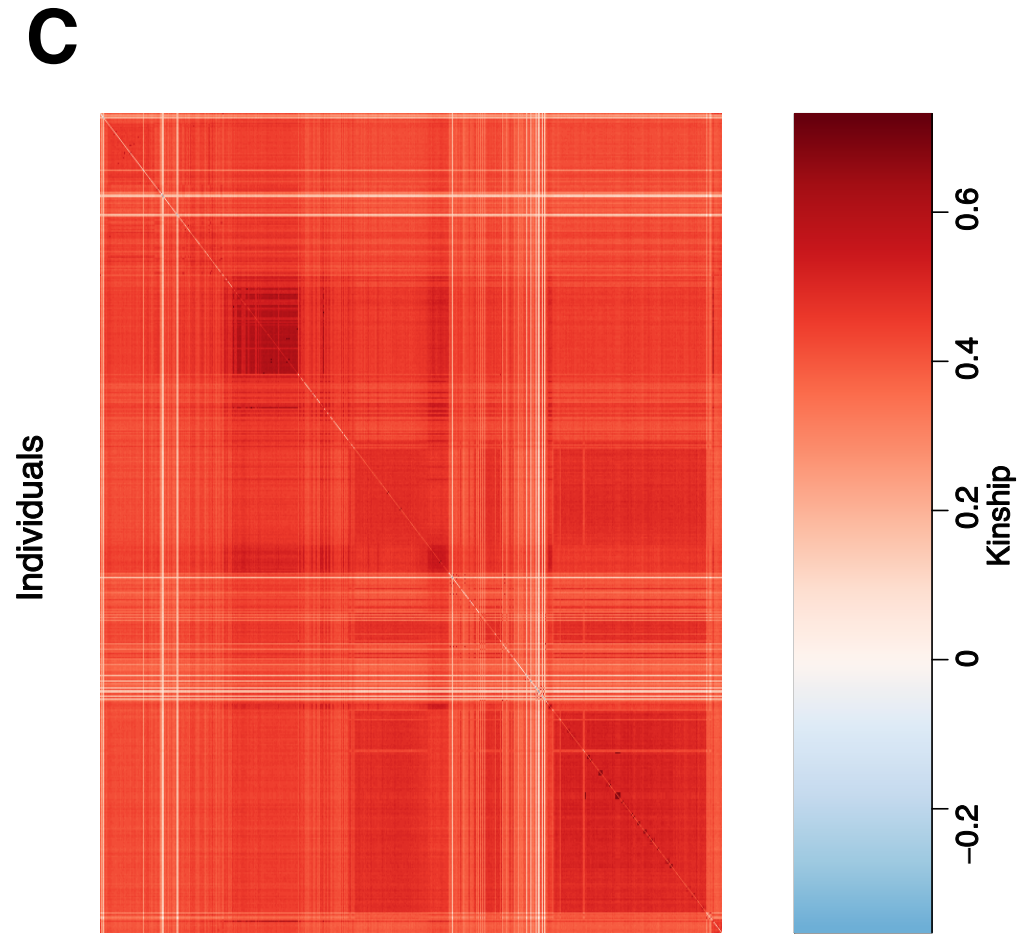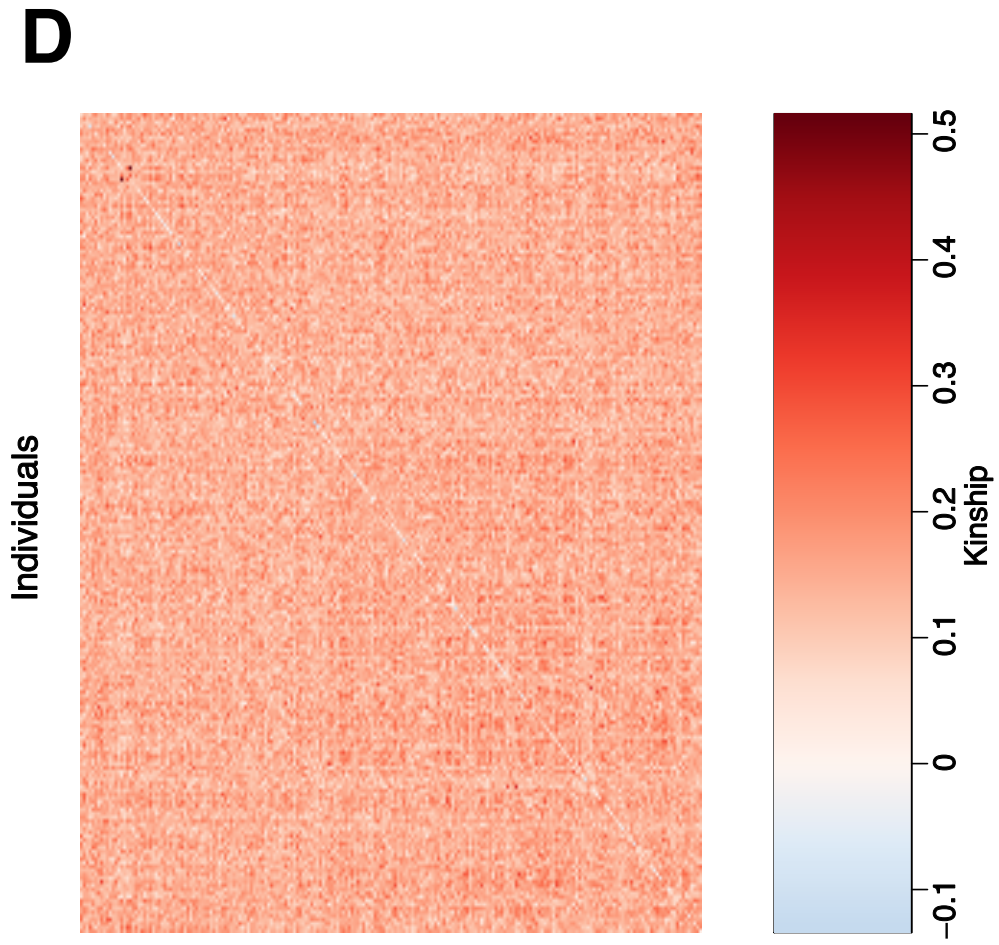

Supplement: Supplementary file 2 [file 1]

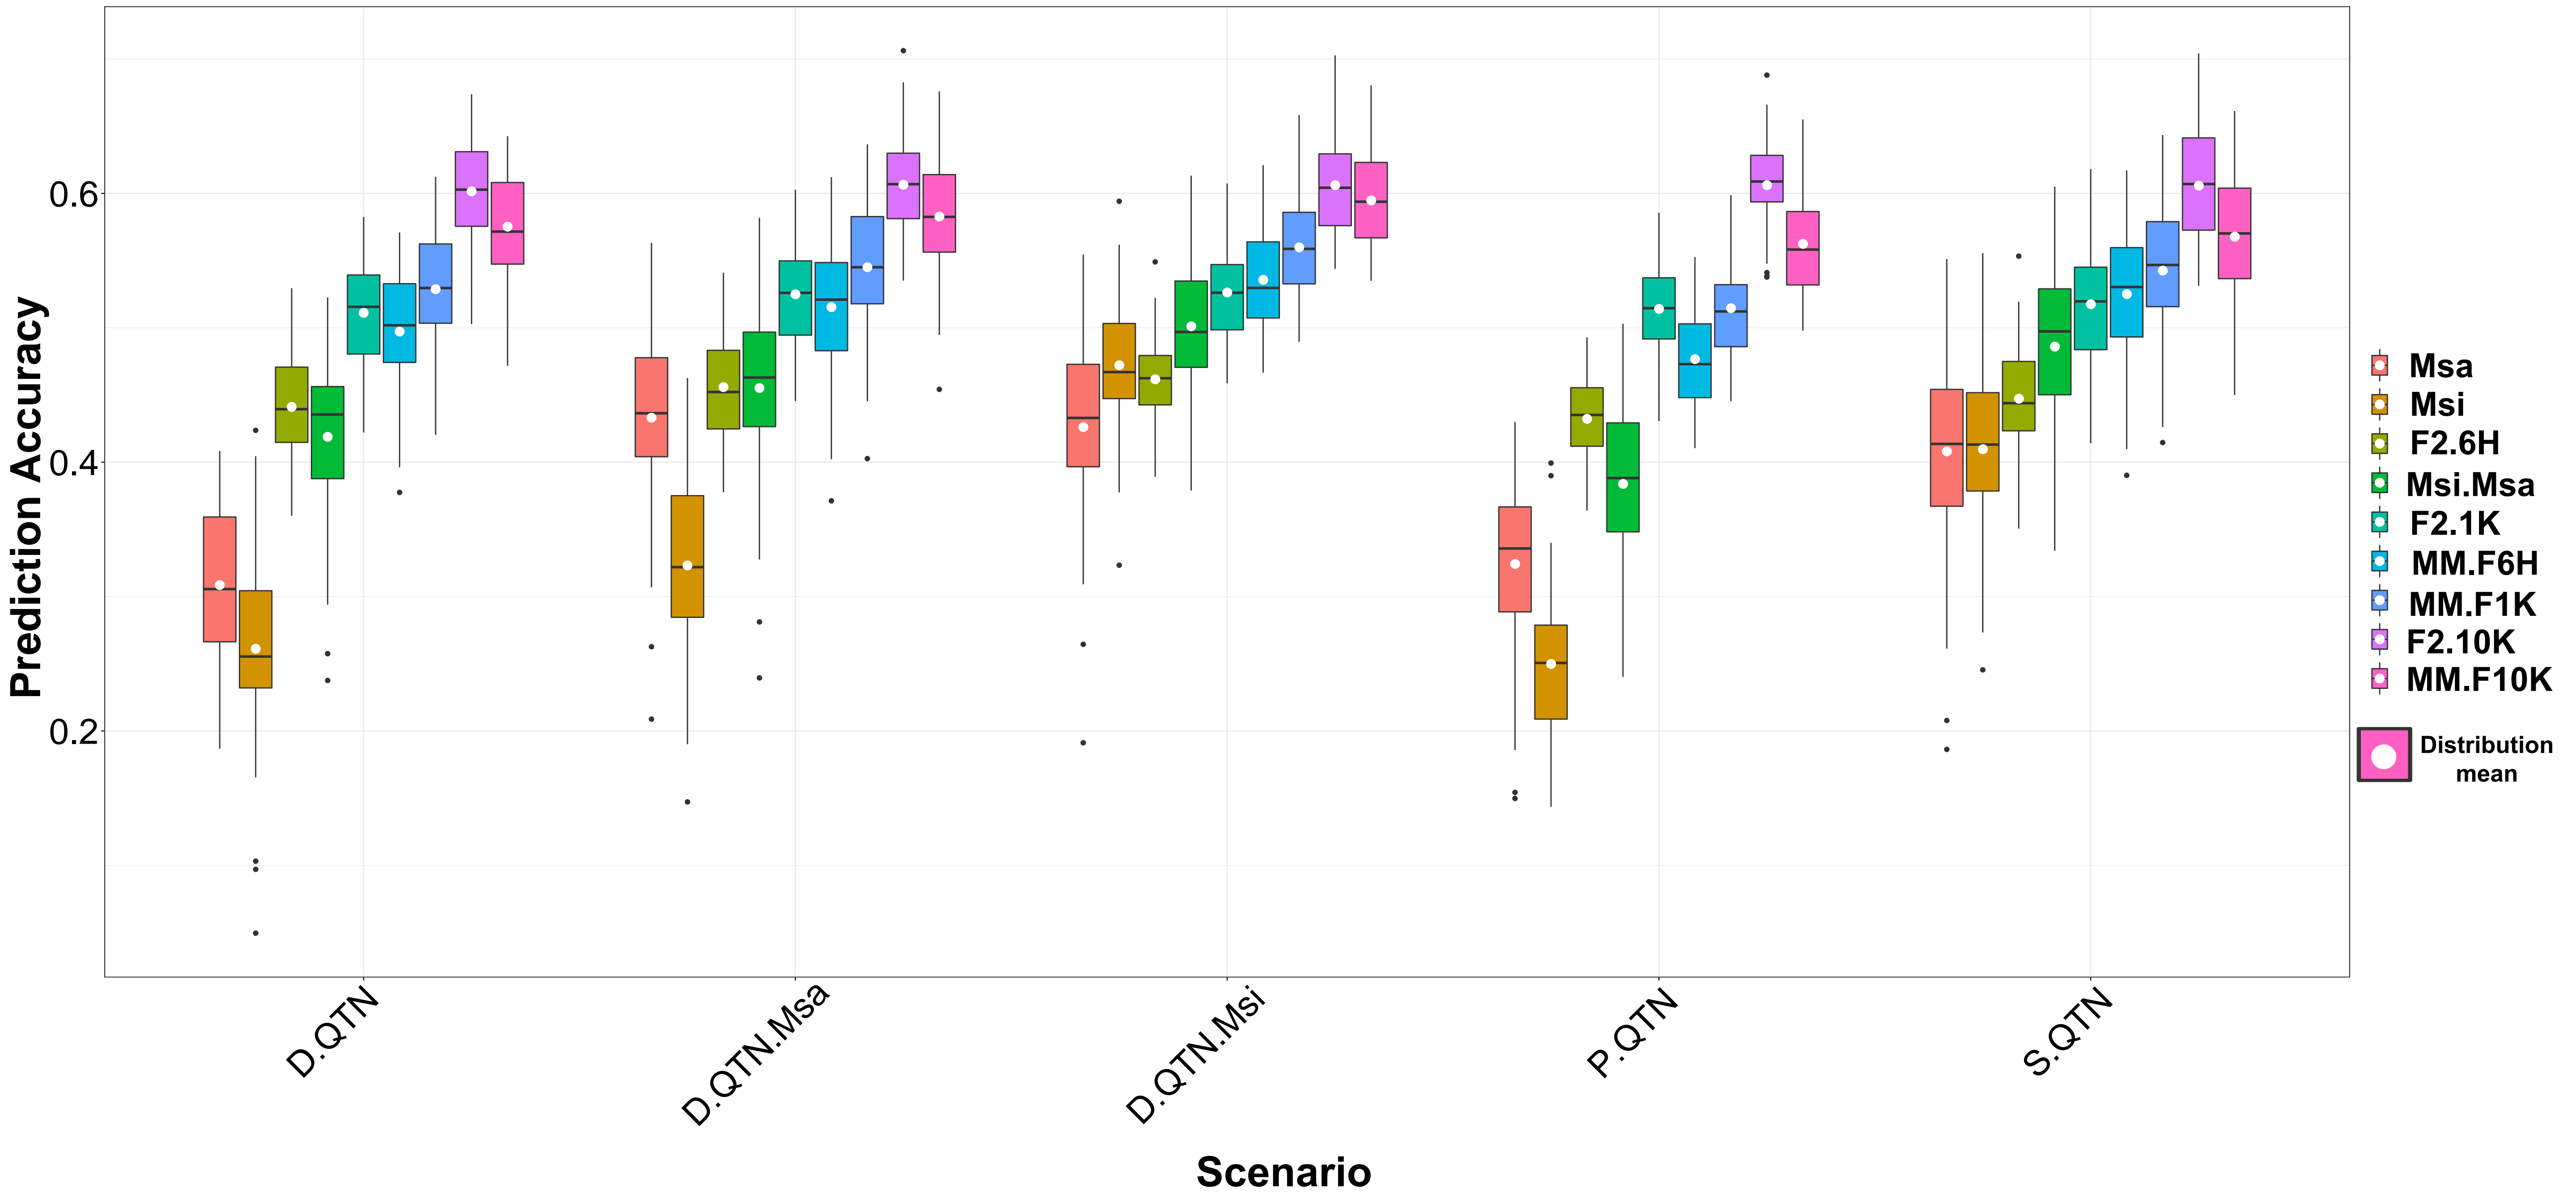

Supplement: Supplementary file 3 [file 1]

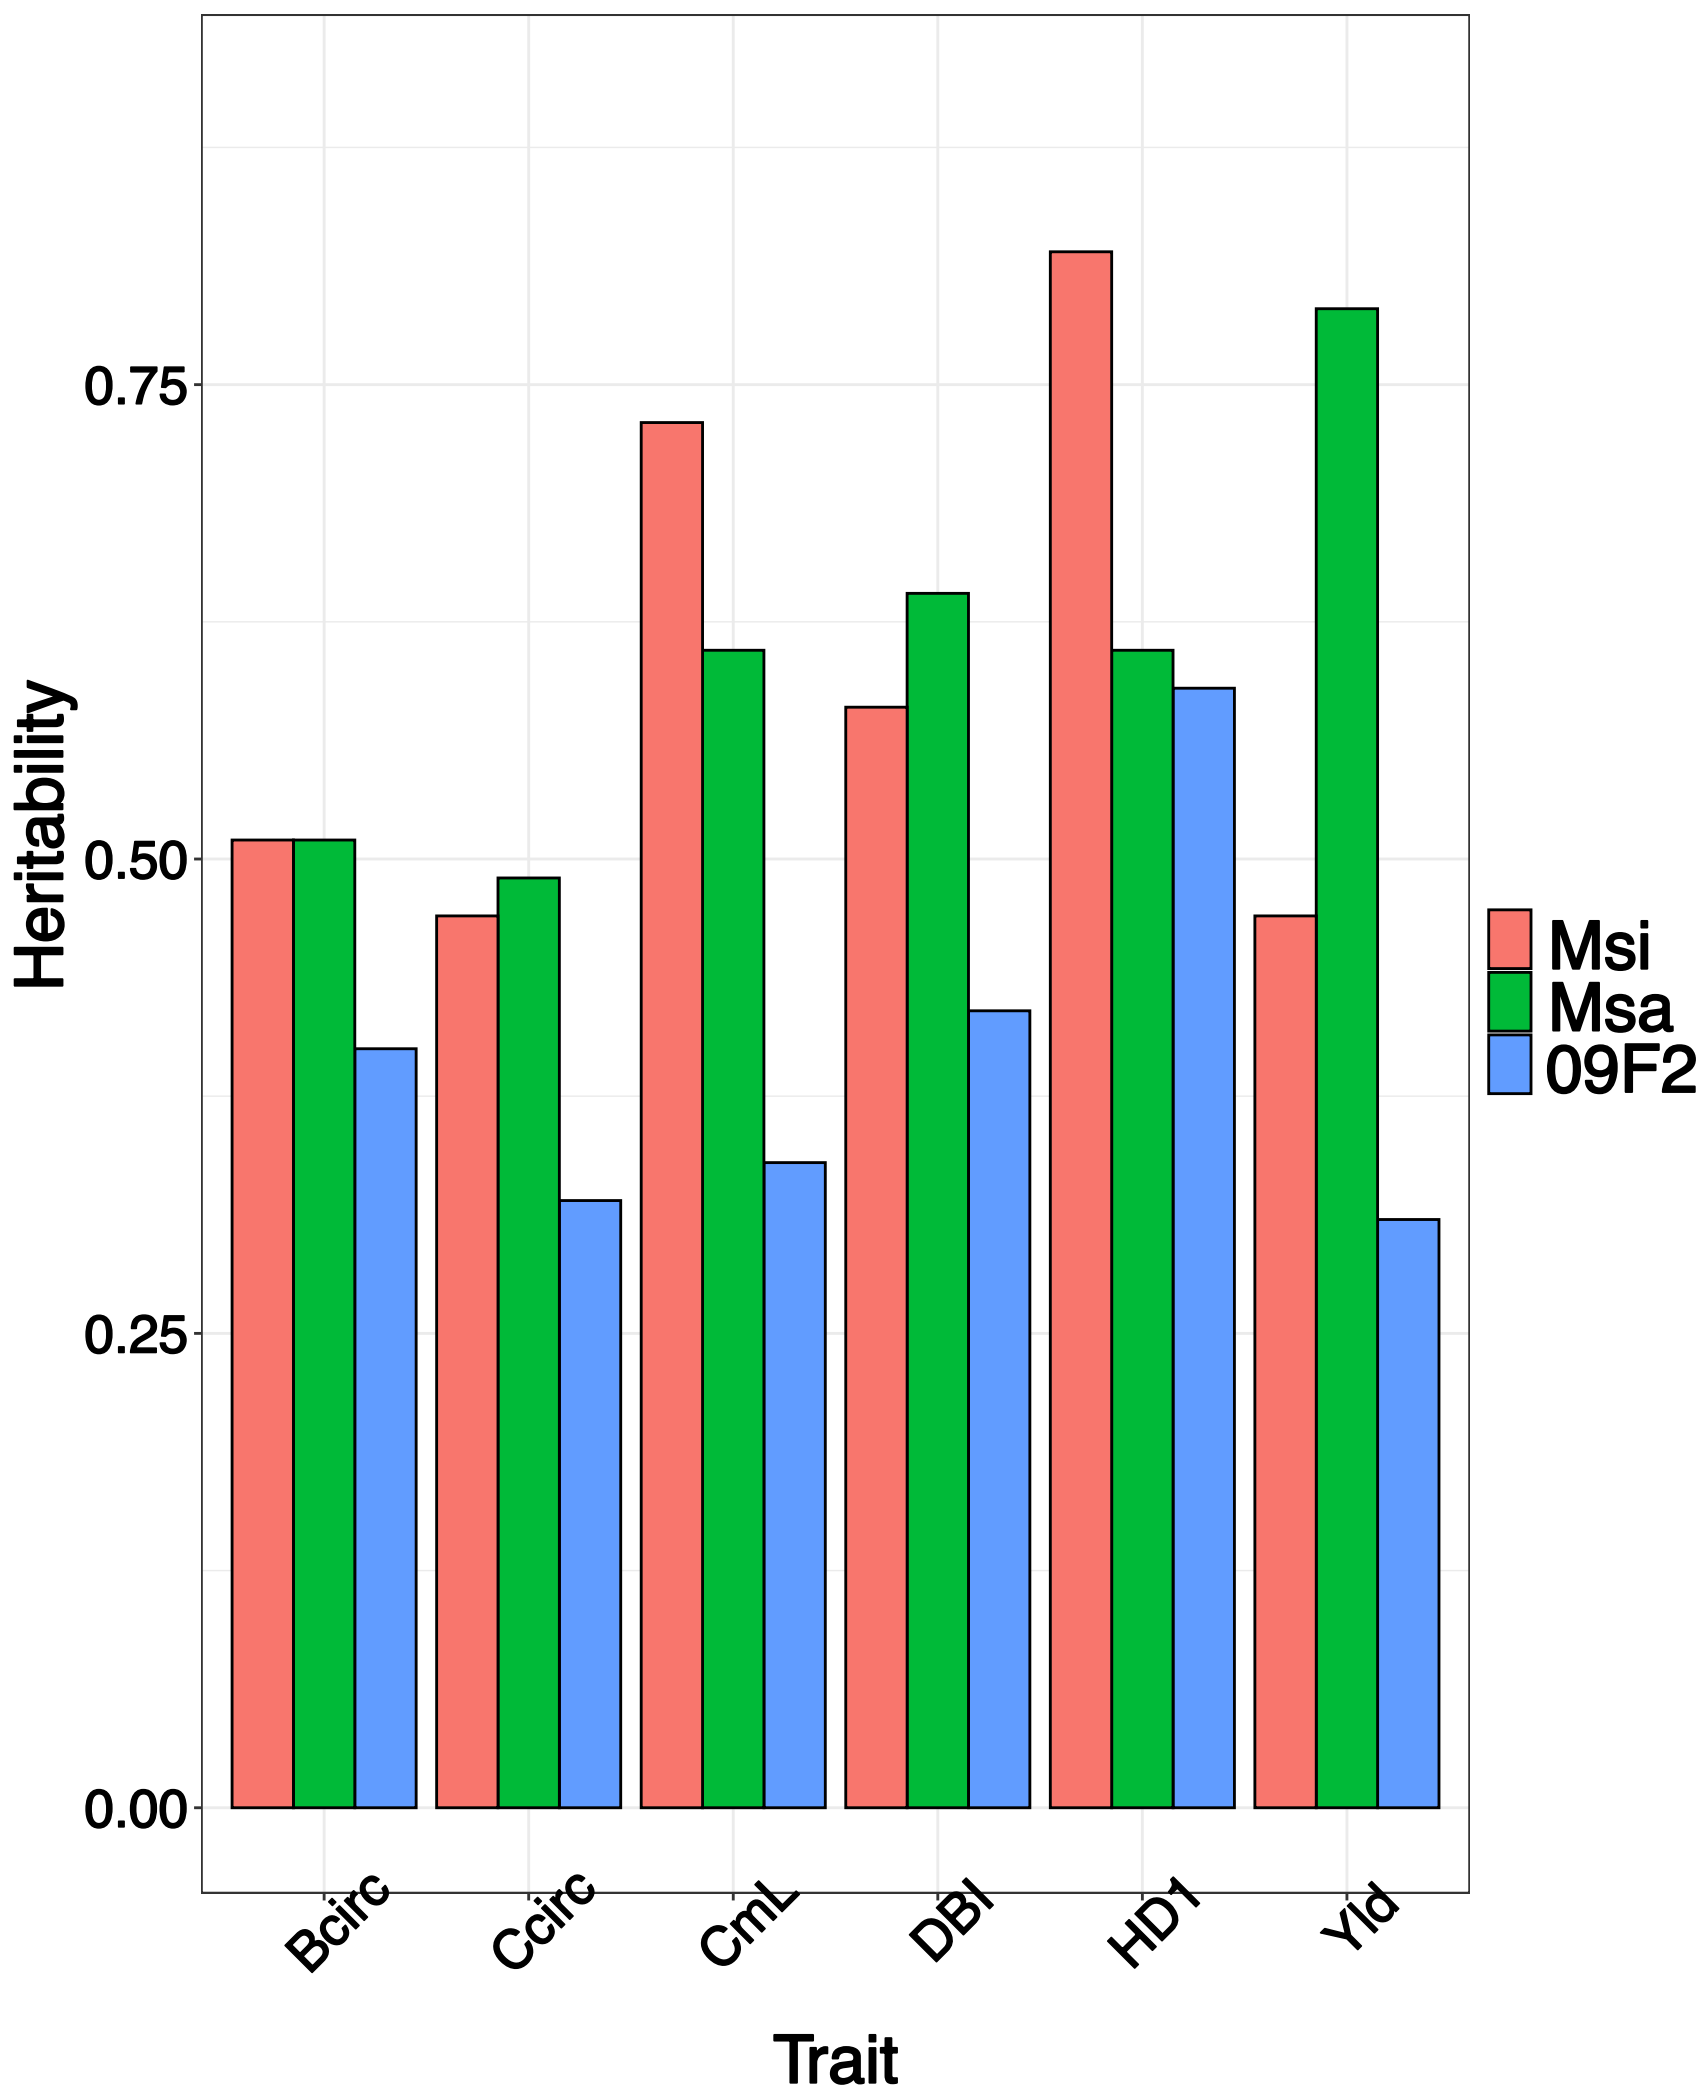

Supplement: Supplementary file 4 [file 1]

**A***Miscanthus sacchariflorus* Subpopulations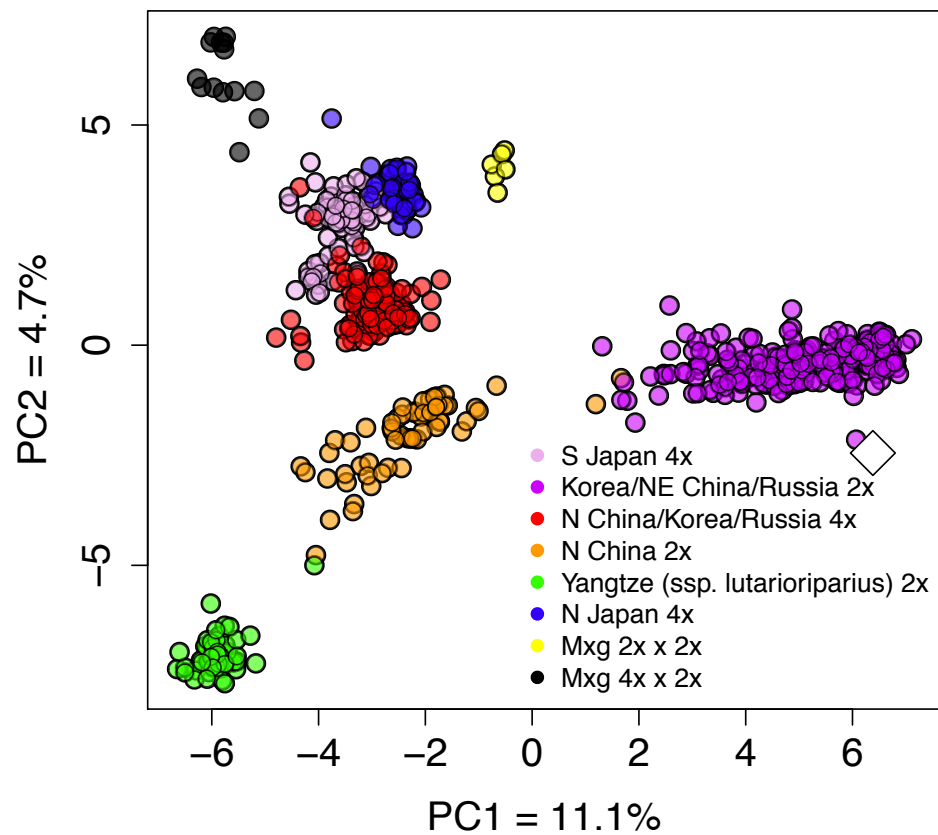**B***Miscanthus sinensis* Subpopulations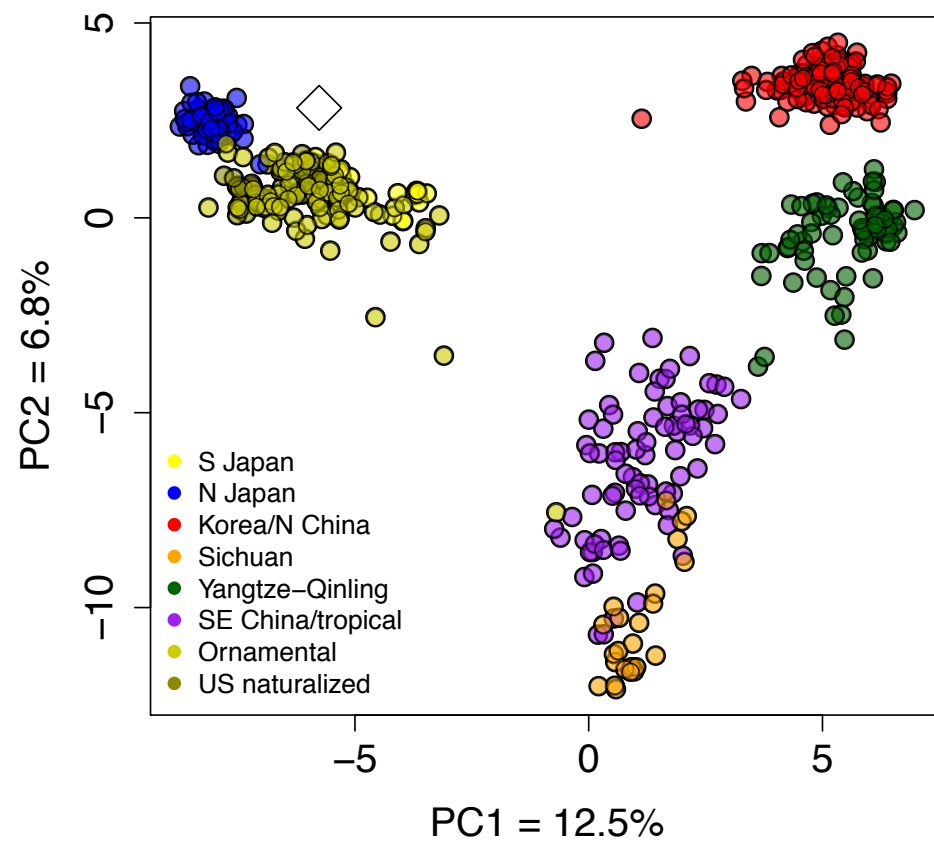

Supplement: Supplementary file 5 [file 1]

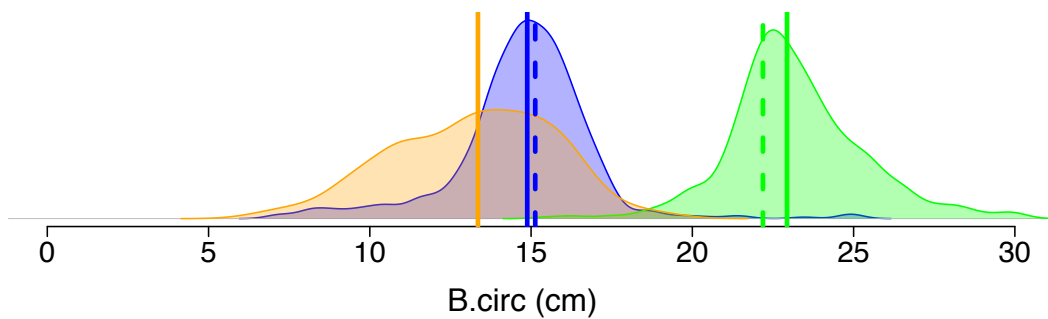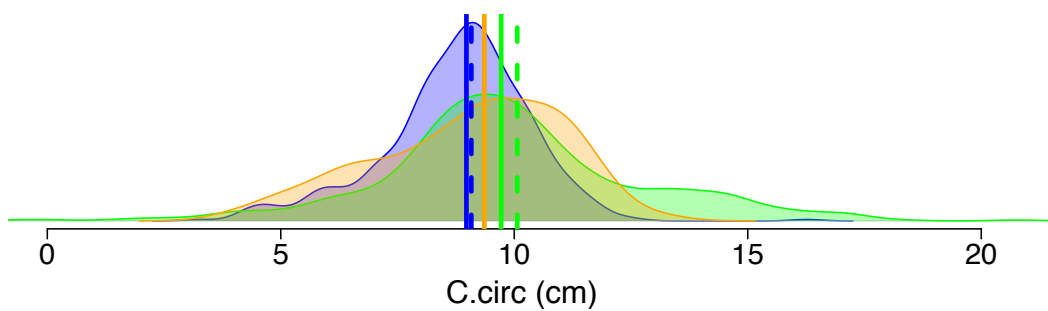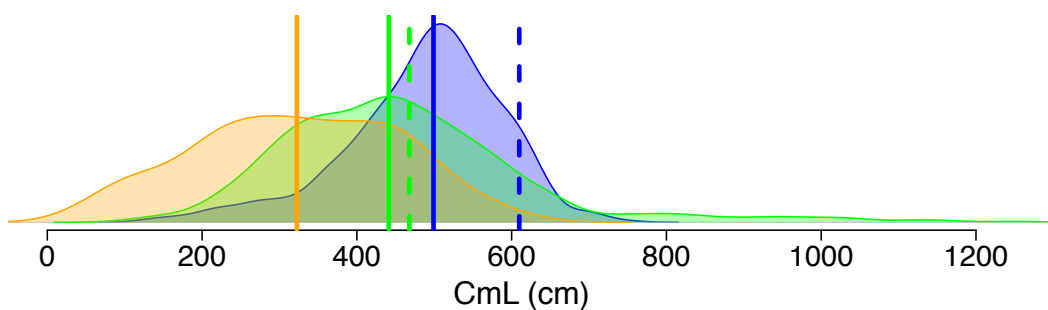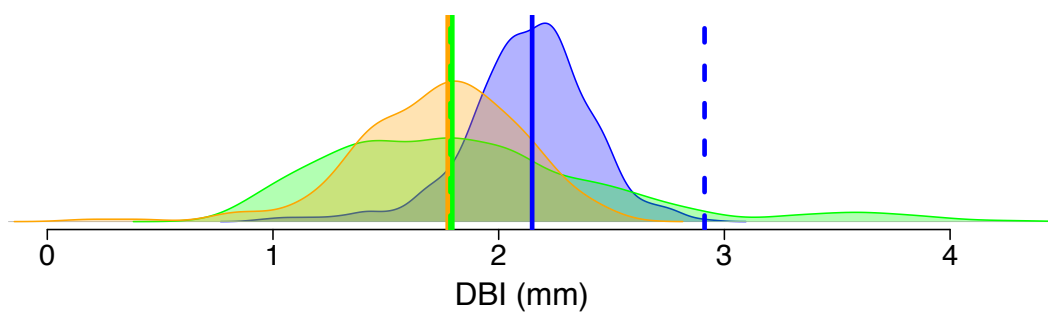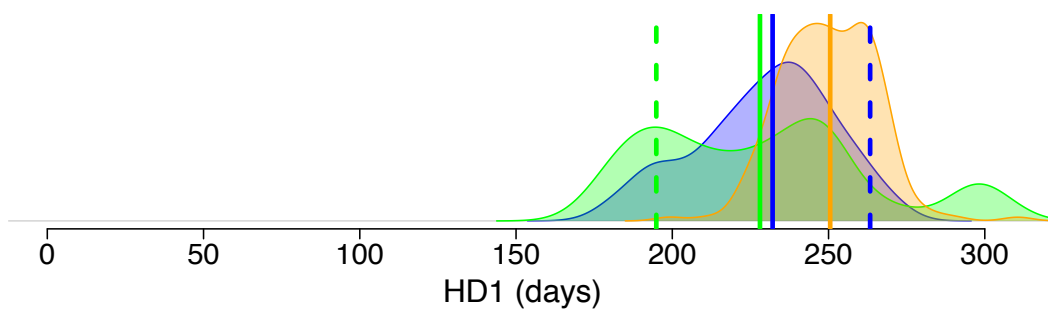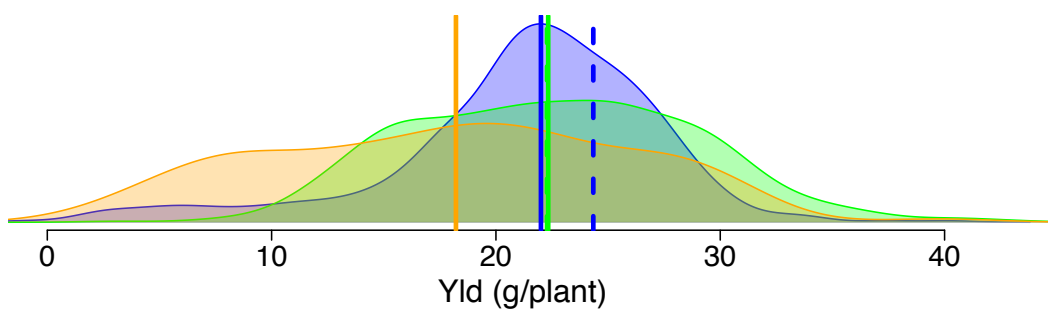

Supplement: Supplementary file 7 [file 1]

**A**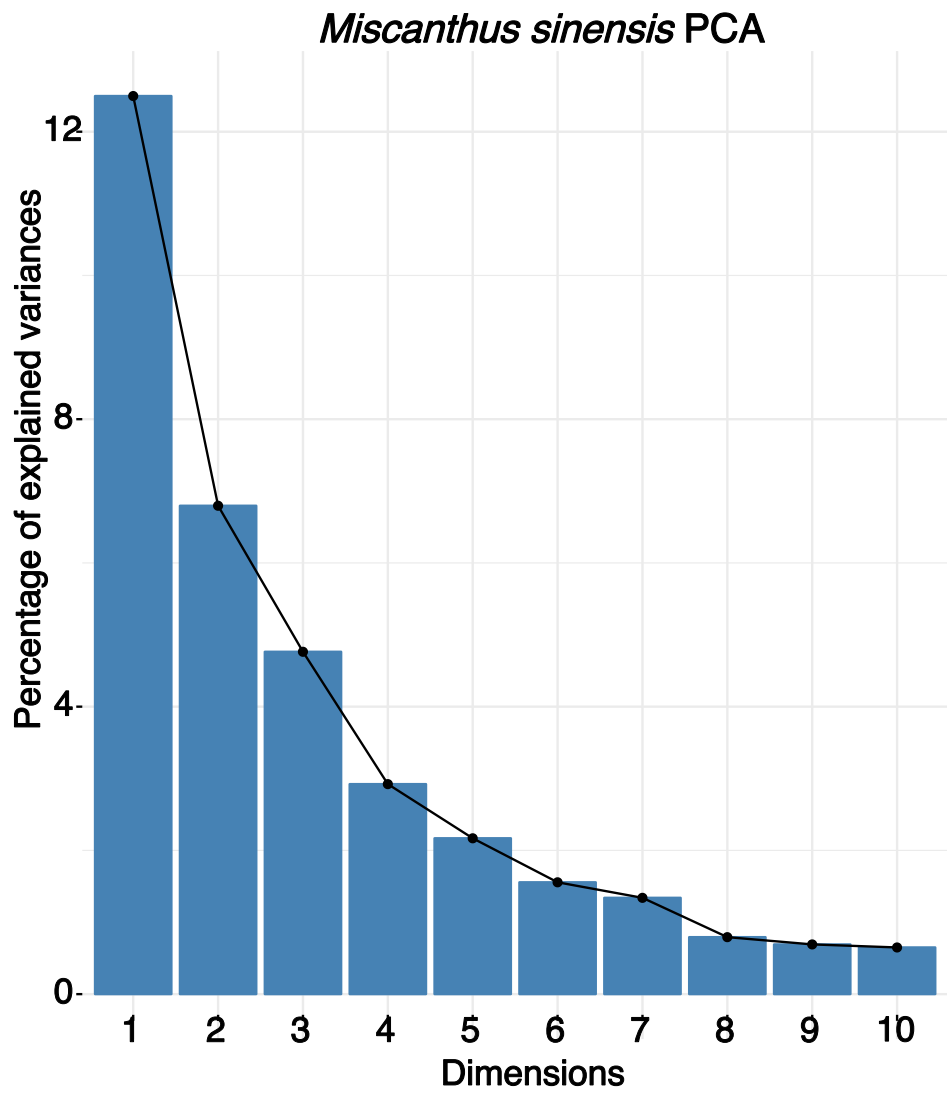**B**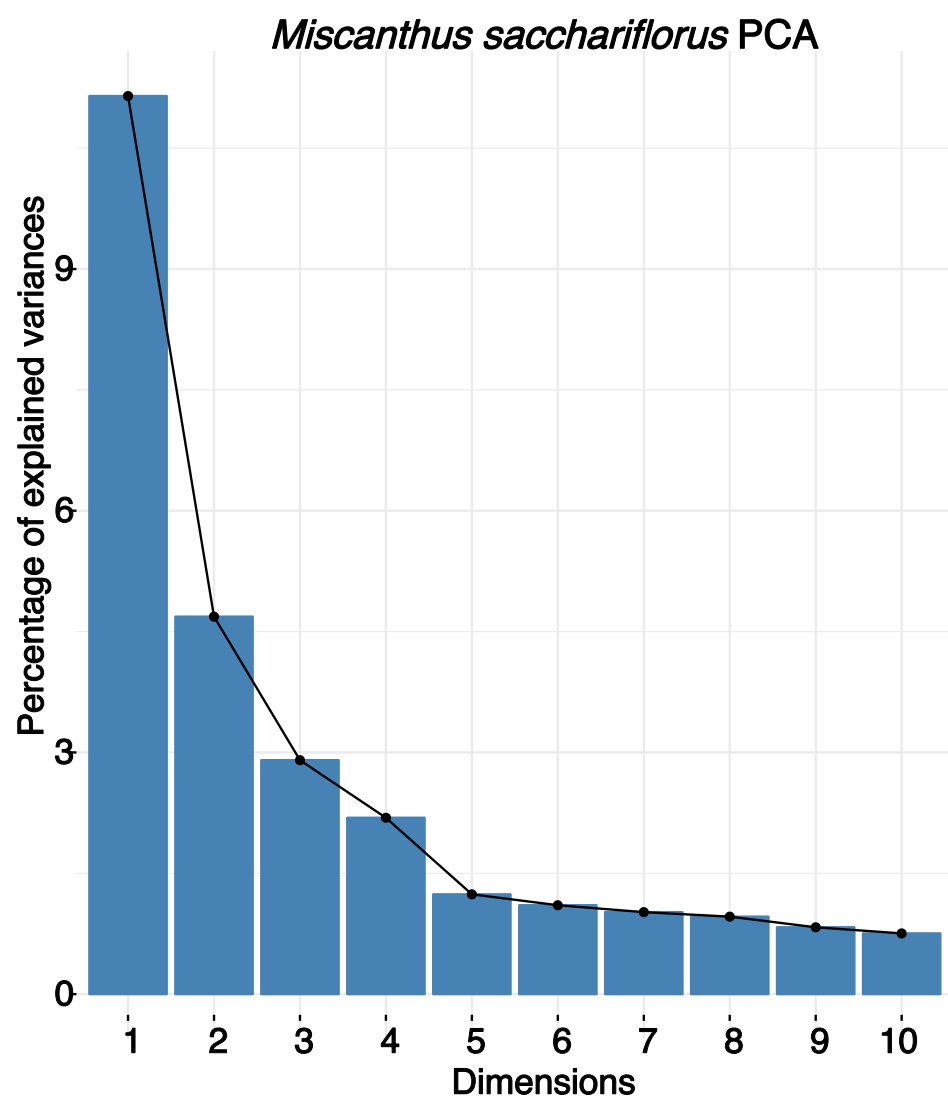

Supplement: Supplementary file 8 [file 1]
